# Supplementary material for: The Prevalence of Iron Deficiency in Atrial Fibrillation: Low Hanging Fruit?
Source: MDPI journal article supplement (doi:10.3390/medicina58101492), 2022-10-19
Supplement: s1 [file s1]

## Supplementary Appendix.

**Table S1.** Frequencies of comorbidities and odds ratio of comorbidities if iron deficient.

| Comorbidity                                  | Whole population<br>n = 134 | Iron deficient group<br>n = 81 |       |                |         |
|----------------------------------------------|-----------------------------|--------------------------------|-------|----------------|---------|
|                                              | Frequency                   | Frequency                      | OR    | 95% CI         | p-value |
| Ischaemic heart disease (IHD)                | 36                          | 23                             | 1.187 | 0.662 - 2.129  | 0.562   |
| Peripheral vascular disease (PVD)            | 10                          | 7                              | 1.606 | 0.435 - 5.931  | 0.527   |
| Congestive cardiac failure (CCF)             | 47                          | 32                             | 1.413 | 0.852-2.343    | 0.167   |
| Hypertension                                 | 72                          | 45                             | 1.104 | 0.796 - 1.532  | 0.548   |
| Valvular heart disease                       | 33                          | 20                             | 1.103 | 0.561 - 1.876  | 0.934   |
| Hyperlipidaemia                              | 38                          | 26                             | 1.472 | 0.817 - 2.651  | 0.186   |
| Obstructive sleep apnoea (OSA)               | 11                          | 8                              | 1.835 | 0.510 - 6.601  | 0.524   |
| Diabetes mellitus                            | 40                          | 33                             | 3.085 | 1.474 - 6.455  | 0.001   |
| Anaemia                                      | 67                          | 45                             | 1.390 | 0.958 - 2.016  | 0.069   |
| Supra-ventricular tachycardia (SVT)          | 5                           | 4                              | 2.650 | 0.305 - 23.062 | 0.648   |
| Chronic kidney disease (CKD)                 | 45                          | 29                             | 1.201 | 0.727 - 1.984  | 0.469   |
| Liver disease                                | 4                           | 2                              | 0.638 | 0.093 - 4.384  | 0.642   |
| Depression                                   | 17                          | 10                             | 0.893 | 0.363 - 2.194  | 0.805   |
| Cigarette smoking                            | 28                          | 17                             | 1.261 | 0.698 - 2.278  | 0.436   |
| Solid tumour                                 | 26                          | 14                             | 0.749 | 0.376 - 1.490  | 0.411   |
| Stroke                                       | 23                          | 19                             | 3.147 | 1.134 - 8.734  | 0.016   |
| Transient ischaemic attack (TIA)             | 9                           | 7                              | 2.290 | 0.494 - 10.606 | 0.271   |
| Venous thromboembolism (VTE)                 | 3                           | 2                              | 1.284 | 0.119 - 13.805 | 1.000   |
| Major bleed                                  | 12                          | 9                              | 1.926 | 0.547 - 6.785  | 0.294   |
| Chronic obstructive pulmonary disease (COPD) | 28                          | 19                             | 1.381 | 0.677 - 2.820  | 0.367   |
| Peptic ulcer disease                         | 8                           | 5                              | 1.091 | 0.272 - 4.373  | 1.000   |
| Dementia                                     | 10                          | 7                              | 1.527 | 0.413 - 5.644  | 0.521   |

**Table S2.** Frequencies and odds ratios of demographics and outcomes observed in the iron deficient group.

| Outcome                                    | Frequency | OR    | 95% CI        | P-value |
|--------------------------------------------|-----------|-------|---------------|---------|
| Sex (Female)                               | 43        | 1.876 | 1.167 - 3.016 | 0.005   |
| Disposition (Admitted to hospital)         | 69        | 0.961 | 0.842 - 1.096 | 0.562   |
| Any medication that increase bleeding risk | 60        | 1.147 | 0.907 - 1.451 | 0.233   |
| Aspirin                                    | 19        | 0.828 | 0.465 - 1.476 | 0.524   |
| Anti-platelets                             | 9         | 0.830 | 0.330 – 2.089 | 0.693   |
| Anti-coagulants                            | 44        | 1.310 | 0.894 - 1.917 | 0.149   |
| Representation to hospital                 | 65        | 0.945 | 0.808 – 1.105 | 0.492   |
| AF recurrence                              | 21        | 0.703 | 0.440 - 1.124 | 0.143   |
| Myocardial infarction (MI)                 | 3         | 1.055 | 0.184 - 6.058 | 1.000   |
| Ischemic Stroke                            | 4         | 1.406 | 0.269 - 7.352 | 1.000   |
| Death                                      | 18        | 2.109 | 0.909 - 4.894 | 0.067   |

**Table S3.** Distribution of Chronic Kidney Disease based on KDIGO Guidelines (131 total patients with renal function available).

| <b>KDIGO Chronic Kidney Disease Stage</b>                                 |                              | <b>Proportion of Patients % (n)</b> |
|---------------------------------------------------------------------------|------------------------------|-------------------------------------|
| Group 1: GFR >90                                                          |                              | 11.5% (15)                          |
| Group 2: GFR 60-89                                                        |                              | 40.5% (53)                          |
| Group 3a: GFR 45-59                                                       |                              | 18.3% (24)                          |
| Group 3b: GFR 30-44                                                       |                              | 17.6% (23)                          |
| Group 4: GFR 15-29                                                        |                              | 8.4% (11)                           |
| Group 5: GFR <15                                                          |                              | 2.3% (3)                            |
| <b>KDIGO Chronic Kidney Disease Stage Based on Iron Deficiency Status</b> |                              |                                     |
| <b>Groups</b>                                                             | <b>Iron Deficient (n=79)</b> | <b>Non-Iron Deficient (n=52)</b>    |
| Group 1: GFR >90                                                          | 6.3% (5)                     | 19.2% (10)                          |
| Group 2: GFR 60-89                                                        | 44.3% (35)                   | 34.6% (18)                          |
| Group 3a: GFR 45-59                                                       | 21.5% (17)                   | 13.5% (7)                           |
| Group 3b: GFR 30-44                                                       | 16.5% (13)                   | 19.2% (10)                          |
| Group 4: GFR 15-29                                                        | 10.1% (8)                    | 5.7% (3)                            |
| Group 5: GFR <15                                                          | 1.3% (1)                     | 7.7% (4)                            |
